# Supplementary material
Source: PubMed Central journal article supplement (PMC3730828)
Supplement: NIHMS489594-supplement-125_2013_2942_MOESM1_ESM.pdf [file NIHMS489594-supplement-125_2013_2942_MOESM1_ESM.pdf]

**ESM Table 1: Effects of Intervention on Measures of Regional [<sup>11</sup>C]HED RI, Endothelial Function, Myocardial Blood Flow, and Measures of Peripheral Neuropathy**

|                                                                        |          | <b>Placebo</b><br>(N=22<br>baseline)<br>(N=18 follow<br>up) | <b>Anti-Oxidant</b><br>(N=22 baseline)<br>(N=13 follow up) | <b>p-value</b> | <b>Anti-oxidant effect</b><br>(95% confidence<br>interval) |
|------------------------------------------------------------------------|----------|-------------------------------------------------------------|------------------------------------------------------------|----------------|------------------------------------------------------------|
| <b>[<sup>11</sup>C]HED RI</b><br>(blood/min/ml<br>tissue)              |          |                                                             |                                                            |                |                                                            |
| Global [ <sup>11</sup> C]HED<br>RI                                     | Baseline | 0.073±0.016                                                 | 0.081±0.017                                                | 0.32           |                                                            |
|                                                                        | 24 mo.   | 0.074±0.016                                                 | 0.070±0.018                                                | 0.045          | -0.010 (-0.020,-0.001)                                     |
| <b>Regional<br/>[<sup>11</sup>C]HED RI</b><br>(blood/min/ml<br>tissue) |          |                                                             |                                                            |                |                                                            |
| Apical                                                                 | Baseline | 0.062±0.016                                                 | 0.070±0.017                                                | 0.32           |                                                            |
|                                                                        | 24 mo.   | 0.062±0.016                                                 | 0.059±0.016                                                | 0.22           | -0.006 (-0.017,0.004)                                      |
| Distal Inferior                                                        | Baseline | 0.071±0.018                                                 | 0.083±0.019                                                | 0.19           |                                                            |
|                                                                        | 24 mo.   | 0.070±0.022                                                 | 0.072±0.020                                                | 0.20           | -0.007 (-0.018,0.004)                                      |
| Distal Lateral                                                         | Baseline | 0.074±0.017                                                 | 0.081±0.020                                                | 0.54           |                                                            |
|                                                                        | 24 mo.   | 0.075±0.016                                                 | 0.068±0.021                                                | 0.054          | -0.011 (-0.023,0.001)                                      |
| Distal Anterior                                                        | Baseline | 0.083±0.020                                                 | 0.086±0.019                                                | 0.94           |                                                            |
|                                                                        | 24 mo.   | 0.083±0.018                                                 | 0.072±0.021                                                | 0.043          | -0.012 (-0.024,-0.001)                                     |
| Distal Septal                                                          | Baseline | 0.082±0.018                                                 | 0.090±0.020                                                | 0.35           |                                                            |
|                                                                        | 24 mo.   | 0.078±0.025                                                 | 0.080±0.019                                                | 0.61           | -0.004 (-0.019,0.011)                                      |
| Proximal Inferior                                                      | Baseline | 0.077±0.018                                                 | 0.083±0.016                                                | 0.47           |                                                            |
|                                                                        | 24 mo.   | 0.076±0.017                                                 | 0.073±0.018                                                | 0.13           | -0.008 (-0.019,0.002)                                      |
| Proximal Lateral                                                       | Baseline | 0.076±0.019                                                 | 0.081±0.019                                                | 0.79           |                                                            |
|                                                                        | 24 mo.   | 0.079±0.019                                                 | 0.069±0.020                                                | 0.043          | -0.013 (-0.025,-0.001)                                     |
| Proximal<br>Anterior                                                   | Baseline | 0.085±0.022                                                 | 0.088±0.018                                                | 0.88           |                                                            |
|                                                                        | 24 mo.   | 0.085±0.020                                                 | 0.074±0.020                                                | 0.030          | -0.014 (-0.026,-0.001)                                     |
| Proximal Septal                                                        | Baseline | 0.079±0.017                                                 | 0.085±0.015                                                | 0.33           |                                                            |

|                                    |          |             |             |      |                       |
|------------------------------------|----------|-------------|-------------|------|-----------------------|
|                                    | 24 mo.   | 0.081±0.017 | 0.079±0.017 | 0.27 | -0.007 (-0.019,0.005) |
| <b>Coronary Flow Reserve (CFR)</b> |          |             |             |      |                       |
| Global CFR                         | Baseline | 2.94±1.70   | 2.95±1.32   | 0.52 |                       |
|                                    | 24 mo.   | 3.22±0.85   | 3.02±1.52   | 0.82 | 0.08 (-0.67,0.84)     |
| <b>Regional CFR</b>                |          |             |             |      |                       |
| Apical                             | Baseline | 3.21±1.87   | 3.21±1.37   | 0.56 |                       |
|                                    | 24 mo.   | 3.41±1.15   | 3.25±1.62   | 0.56 | 0.28 (-0.69,1.24)     |
| Distal Inferior                    | Baseline | 2.88±1.80   | 2.73±0.89   | 0.89 |                       |
|                                    | 24 mo.   | 2.96±0.87   | 2.92±1.58   | 0.66 | 0.20 (-0.73,1.14)     |
| Distal Lateral                     | Baseline | 2.88±2.26   | 3.34±3.26   | 0.26 |                       |
|                                    | 24 mo.   | 3.02±0.76   | 2.77±1.56   | 0.72 | 0.13 (-0.63,0.90)     |
| Distal Anterior                    | Baseline | 2.88±2.19   | 2.83±1.68   | 0.65 |                       |
|                                    | 24 mo.   | 3.12±1.39   | 2.79±1.44   | 0.95 | -0.02 (-0.83,0.78)    |
| Distal Septal                      | Baseline | 3.07±1.79   | 2.66±0.96   | 0.58 |                       |
|                                    | 24 mo.   | 3.25±1.19   | 3.24±1.87   | 0.61 | 0.28 (-0.81,1.36)     |
| Proximal Inferior                  | Baseline | 2.46±1.06   | 2.56±0.88   | 0.48 |                       |
|                                    | 24 mo.   | 2.97±0.95   | 2.96±1.40   | 0.72 | 0.15 (-0.69,0.98)     |
| Proximal Lateral                   | Baseline | 2.87±1.39   | 3.14±2.01   | 0.22 |                       |
|                                    | 24 mo.   | 3.28±1.50   | 2.62±1.27   | 0.42 | -0.35 (-1.23,0.53)    |
| Proximal Anterior                  | Baseline | 2.97±2.21   | 2.94±1.54   | 0.53 |                       |
|                                    | 24 mo.   | 3.37±1.88   | 3.02±1.71   | 0.92 | -0.05 (-1.14,1.03)    |
| Proximal Septal                    | Baseline | 2.80±1.54   | 2.69±1.09   | 0.81 |                       |
|                                    | 24 mo.   | 3.29±1.26   | 3.25±2.09   | 0.56 | 0.27 (-0.67,1.21)     |
| <b>Resting Perfusion</b>           |          |             |             |      |                       |
| Global MBF                         | Baseline | 0.82±0.23   | 0.86±0.30   | 0.71 |                       |
|                                    | 24 mo.   | 0.69±0.13   | 0.79±0.19   | 0.21 | 0.06 (-0.04,0.16)     |
| <b>Regional MBF</b>                |          |             |             |      |                       |
| Apical                             | Baseline | 0.59±0.16   | 0.57±0.18   | 0.12 |                       |
|                                    | 24 mo.   | 0.48±0.13   | 0.55±0.14   | 0.40 | 0.04 (-0.06,0.15)     |

|                         |          |           |           |      |                    |
|-------------------------|----------|-----------|-----------|------|--------------------|
| Distal Inferior         | Baseline | 0.86±0.26 | 0.87±0.3  | 0.50 |                    |
|                         | 24 mo.   | 0.73±0.13 | 0.80±0.22 | 0.45 | 0.04 (-0.07,0.16)  |
| Distal Lateral          | Baseline | 0.86±0.24 | 0.90±0.39 | 0.69 |                    |
|                         | 24 mo.   | 0.72±0.14 | 0.85±0.29 | 0.22 | 0.08 (-0.05,0.22)  |
| Distal Anterior         | Baseline | 0.84±0.26 | 0.92±0.39 | 0.89 |                    |
|                         | 24 mo.   | 0.71±0.16 | 0.85±0.30 | 0.26 | 0.09 (-0.07,0.24)  |
| Distal Septal           | Baseline | 0.85±0.31 | 0.98±0.40 | 0.67 |                    |
|                         | 24 mo.   | 0.77±0.18 | 0.83±0.22 | 0.73 | 0.02 (-0.11,0.15)  |
| Proximal Inferior       | Baseline | 0.96±0.29 | 0.97±0.29 | 0.82 |                    |
|                         | 24 mo.   | 0.77±0.13 | 0.86±0.18 | 0.15 | 0.07 (-0.03,0.17)  |
| Proximal Lateral        | Baseline | 0.91±0.32 | 0.96±0.42 | 0.98 |                    |
|                         | 24 mo.   | 0.78±0.19 | 0.91±0.27 | 0.22 | 0.10 (-0.06,0.25)  |
| Proximal Anterior       | Baseline | 0.95±0.29 | 0.98±0.40 | 0.64 |                    |
|                         | 24 mo.   | 0.82±0.23 | 0.92±0.30 | 0.64 | 0.04 (-0.13,0.20)  |
| Proximal Septal         | Baseline | 0.95±0.30 | 1.03±0.39 | 0.98 |                    |
|                         | 24 mo.   | 0.80±0.21 | 0.91±0.24 | 0.44 | 0.05 (-0.09,0.20)  |
| <b>Stress Perfusion</b> |          |           |           |      |                    |
| Global MBF              | Baseline | 2.03±0.44 | 2.12±0.46 | 0.48 |                    |
|                         | 24 mo.   | 2.05±0.39 | 1.99±0.50 | 0.53 | -0.08 (-0.35,0.19) |
| <b>Regional MBF</b>     |          |           |           |      |                    |
| Apical                  | Baseline | 1.61±0.40 | 1.58±0.40 | 0.75 |                    |
|                         | 24 mo.   | 1.49±0.38 | 1.48±0.42 | 0.72 | 0.05 (-0.22,0.31)  |
| Distal Inferior         | Baseline | 2.14±0.64 | 2.17±0.62 | 0.84 |                    |
|                         | 24 mo.   | 2.01±0.76 | 2.03±0.57 | 0.74 | 0.09 (-0.46,0.63)  |
| Distal Lateral          | Baseline | 2.08±0.50 | 2.19±0.43 | 0.41 |                    |
|                         | 24 mo.   | 2.05±0.39 | 1.95±0.47 | 0.79 | -0.04 (-0.39,0.30) |
| Distal Anterior         | Baseline | 1.96±0.39 | 2.14±0.50 | 0.23 |                    |
|                         | 24 mo.   | 2.04±0.52 | 1.96±0.43 | 0.43 | -0.10 (-0.36,0.16) |
| Distal Septal           | Baseline | 2.20±0.58 | 2.34±0.71 | 0.62 |                    |
|                         | 24 mo.   | 2.34±0.72 | 2.31±0.82 | 0.85 | -0.05 (-0.55,0.46) |

|                                         |          |           |           |       |                    |
|-----------------------------------------|----------|-----------|-----------|-------|--------------------|
| Proximal Inferior                       | Baseline | 2.14±0.54 | 2.29±0.61 | 0.40  |                    |
|                                         | 24 mo.   | 2.16±0.59 | 2.25±0.66 | 0.66  | 0.11 (-0.38,0.59)  |
| Proximal Lateral                        | Baseline | 2.23±0.50 | 2.41±0.45 | 0.19  |                    |
|                                         | 24 mo.   | 2.27±0.49 | 2.08±0.36 | 0.08  | -0.28 (-0.58,0.03) |
| Proximal Anterior                       | Baseline | 2.22±0.57 | 2.39±0.58 | 0.22  |                    |
|                                         | 24 mo.   | 2.39±0.67 | 2.25±0.53 | 0.21  | -0.21 (-0.54,0.12) |
| Proximal Septal                         | Baseline | 2.32±0.71 | 2.47±0.79 | 0.46  |                    |
|                                         | 24 mo.   | 2.46±0.72 | 2.46±1.01 | 0.63  | -0.11 (-0.58,0.36) |
| <b>Nerve Conduction Studies</b>         |          |           |           |       |                    |
| Sural Amplitude, (uV)                   | Baseline | 4.4±3.8   | 4.7±4.1   | 0.93  |                    |
|                                         | 24 mo.   | 6.0±5.0   | 3.4±3.6   | 0.11  | -3.07 (-6.92,0.78) |
| Sural Conduction Velocity (m/s)         | Baseline | 32.6±20.0 | 27.7±19.8 | 0.50  |                    |
|                                         | 24 mo.   | 39.1±16.5 | 28.1±24.4 | 0.28  | -9.04 (-25.8,7.7)  |
| Peroneal Motor Amplitude (uV)           | Baseline | 3.9±2.7   | 2.7±2.1   | 0.054 |                    |
|                                         | 24 mo.   | 3.7±3.3   | 4.5±4.2   | 0.2   | 1.12 (-0.6,2.9)    |
| Peroneal Motor, F-wave                  | Baseline | 34.4±24.8 | 31.4±24.9 | 0.79  |                    |
|                                         | 24 mo.   | 26.8±27.7 | 45.8±21.2 | 0.13  | -14.4 (-33.5,4.7)  |
| Ulnar Sensory Amplitude (uV)            | Baseline | 12.1±9.1  | 12.6±10.2 | 0.57  |                    |
|                                         | 24 mo.   | 12.4±11.7 | 11.8±8.1  | 0.58  | -1.55 (-7.2,4.1)   |
| Ulnar Sensory Conduction Velocity (m/s) | Baseline | 41.6±14.9 | 41.8±15.4 | 0.69  |                    |
|                                         | 24 mo.   | 43.5±17.7 | 46.0±16.0 | 0.69  | 2.3 (-9.3,14.0)    |
| <b>QSART and QST</b>                    |          |           |           |       |                    |
| Proximal Leg Total Sweat Volume (ul)    | Baseline | 1.01±1.36 | 1.21±1.18 | 0.6   |                    |
|                                         | 24 mo.   | 1.41±1.29 | 0.92±0.83 | 0.33  | -0.41 (-1.26,0.43) |

|                                                                   |          |           |           |       |                    |
|-------------------------------------------------------------------|----------|-----------|-----------|-------|--------------------|
| Distal Leg Total<br>Sweat Volume<br>(ul)                          | Baseline | 0.99±1.28 | 0.82±0.96 | 0.85  |                    |
|                                                                   | 24 mo.   | 0.96±1.14 | 1.52±1.21 | 0.029 | 0.73 (0.08,1.37)   |
| Foot Total Sweat<br>Volume (ul)                                   | Baseline | 0.80±0.81 | 0.65±0.84 | 0.91  |                    |
|                                                                   | 24 mo.   | 0.68±0.95 | 1.08±1.38 | 0.27  | 0.50 (-0.42,1.42)  |
| Cold Perception<br>Threshold (ND)                                 | Baseline | 1.93±0.53 | 1.71±0.96 | 0.78  |                    |
|                                                                   | 24 mo.   | 1.66±0.67 | 2.03±0.35 | 0.10  | 0.39 (-0.06,0.84)  |
| Vibration<br>Perception<br>Threshold (ND)                         | Baseline | 1.81±0.74 | 1.62±0.90 | 0.43  |                    |
|                                                                   | 24 mo.   | 0.91±1.52 | 1.71±0.69 | 0.18  | 0.72 (-0.36,1.80)  |
| <b>Intraepidermal<br/>nerve fibre<br/>density<br/>(fibres/mm)</b> |          |           |           |       |                    |
| Distal Leg<br>IENFD                                               | Baseline | 1.64±2.01 | 2.72±2.31 | 0.35  |                    |
|                                                                   | 24 mo.   | 1.57±1.94 | 1.86±1.99 | 0.19  | -0.58 (-1.48,0.31) |
| Proximal Thigh<br>IENFD                                           | Baseline | 5.12±3.79 | 7.53±6.36 | 0.25  |                    |
|                                                                   | 24 mo.   | 6.86±4.80 | 5.76±3.15 | 0.47  | -0.92 (-3.54,1.70) |

All data shown as mean ± SD; P-value computed using general linear model (GLM) adjusted for age strata, sex and HbA1c if baseline and for baseline value, age strata, sex and HbA1c if 24 mo.; nerve conduction studies were also adjusted for temperature of the limb (see Methods). Anti-oxidant effect is the adjusted mean difference between the anti-oxidant group and the placebo group when the p-value is <0.05.

CFR: coronary flow reserve, MBF: myocardial blood flow; QSART: quantitative sudomotor axon reflex testing; QST: quantitative sensory testing; ND: normal deviates; IENFD: Intraepidermal nerve fibre density
